# Supplementary material
Source: PubMed Central journal article supplement (PMC10859728)
Supplement: NIHMS1963052-supplement-Supp_Fig_2.pdf [file NIHMS1963052-supplement-Supp_Fig_2.pdf]

## A *OPRM1* rs1799971 association with acute postsurgical opioid use

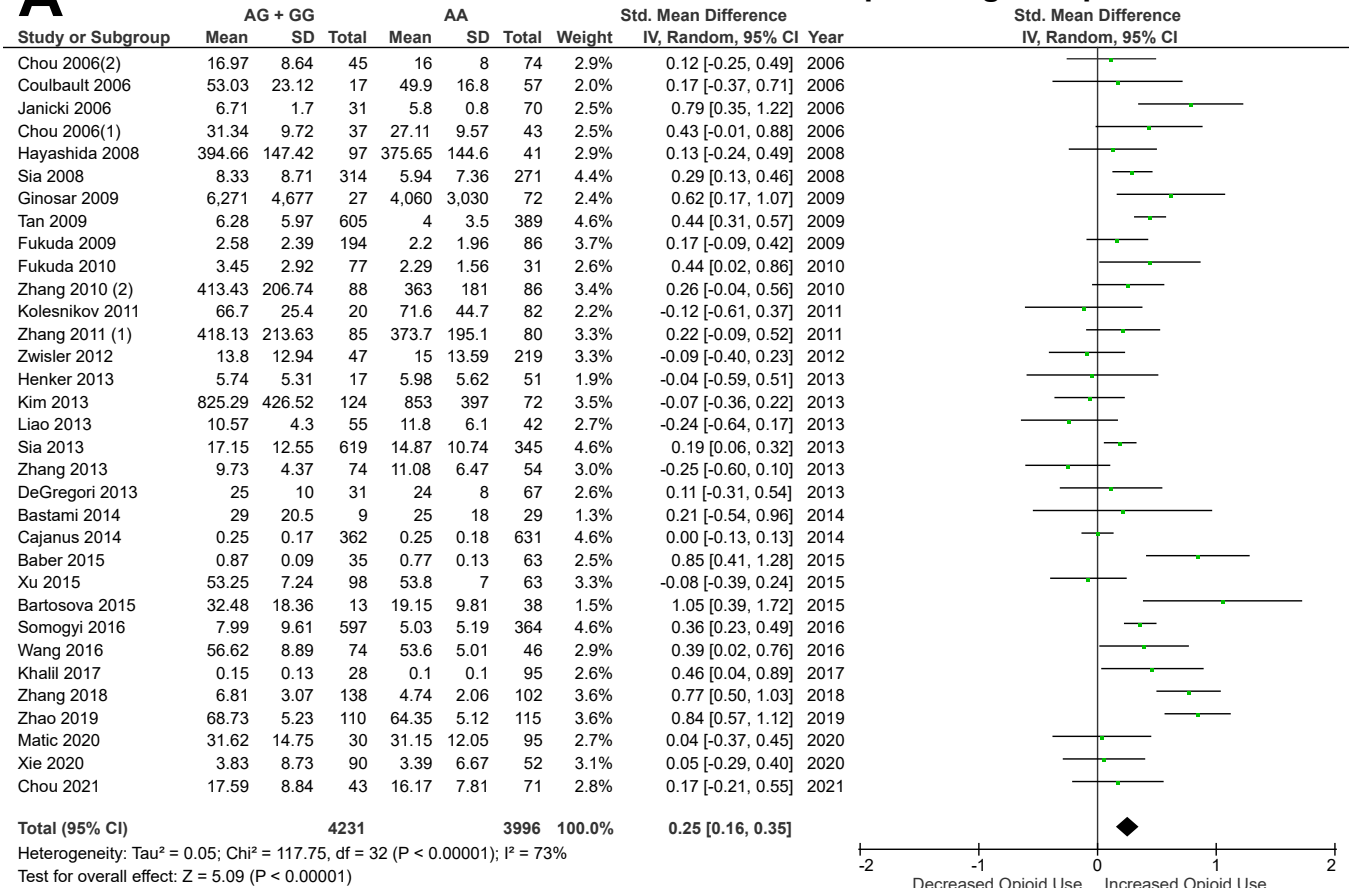

## B *OPRM1* rs1799971 association with acute postsurgical pain score

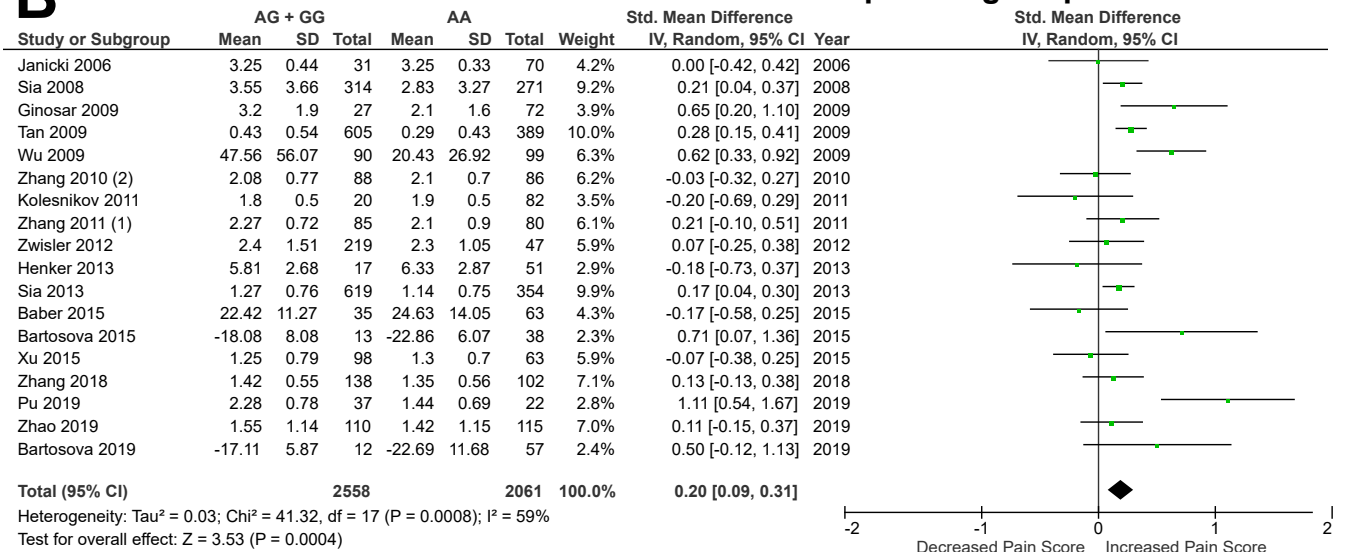

## C *OPRM1* rs1799971 association with chronic postsurgical pain score

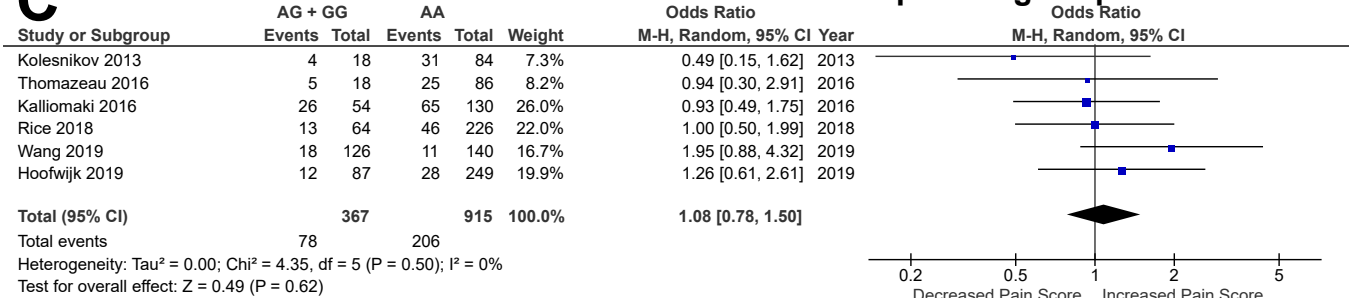

**Supplemental Figure 2: Forest plots of association of *OPRM1* rs1799971 allele with postsurgical pain**
