# Supplementary material
Source: PubMed Central journal article supplement (PMC10859728)
Supplement: NIHMS1963052-supplement-Supp_Fig_3.pdf [file NIHMS1963052-supplement-Supp_Fig_3.pdf]

## A COMT rs4680 association with chronic postsurgical pain score

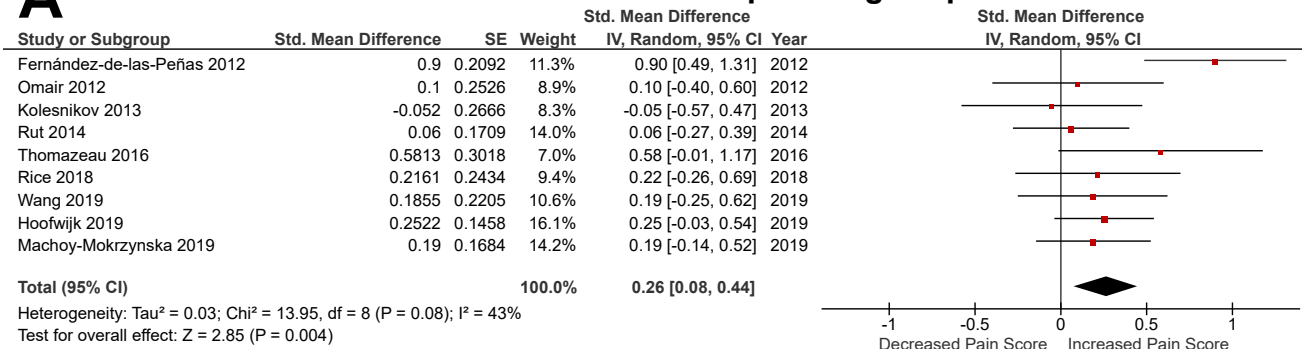

## B COMT rs4680 association with acute postsurgical opioid use (dominant)

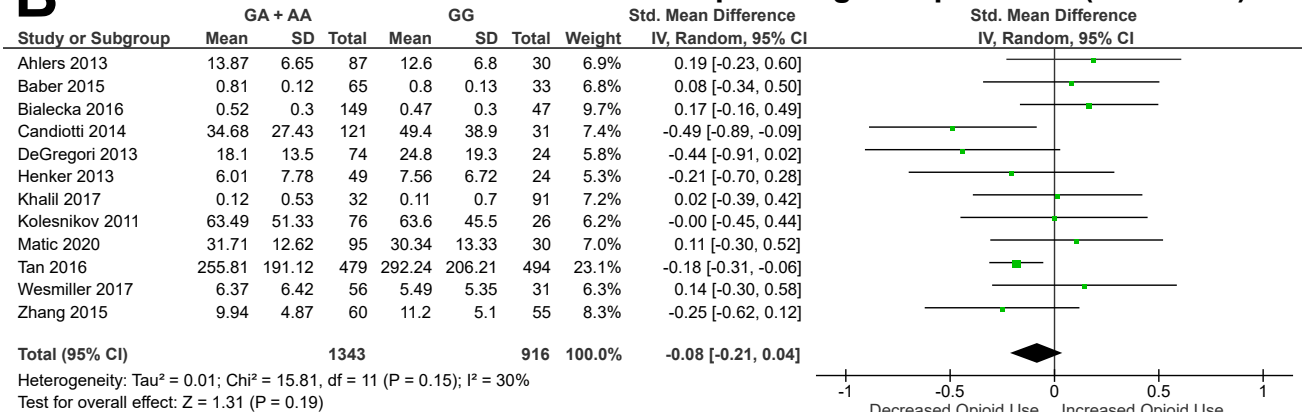

## C COMT rs4680 association with acute postsurgical opioid use (recessive)

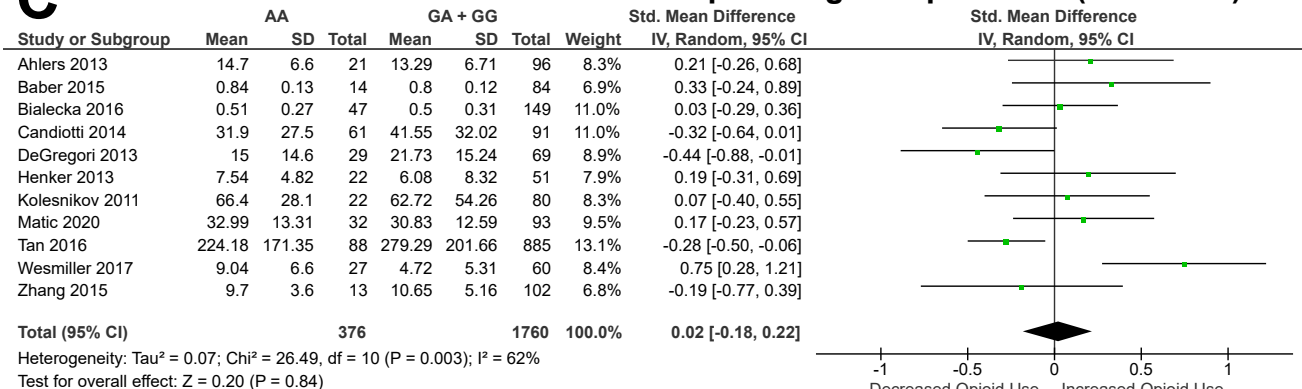

## D COMT rs4680 association with acute postsurgical pain score (dominant)

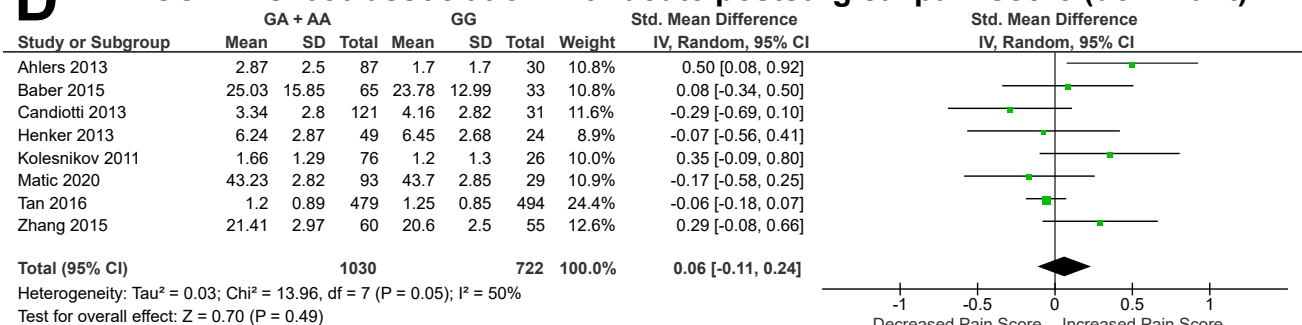

## E COMT rs4680 association with acute postsurgical pain score (recessive)

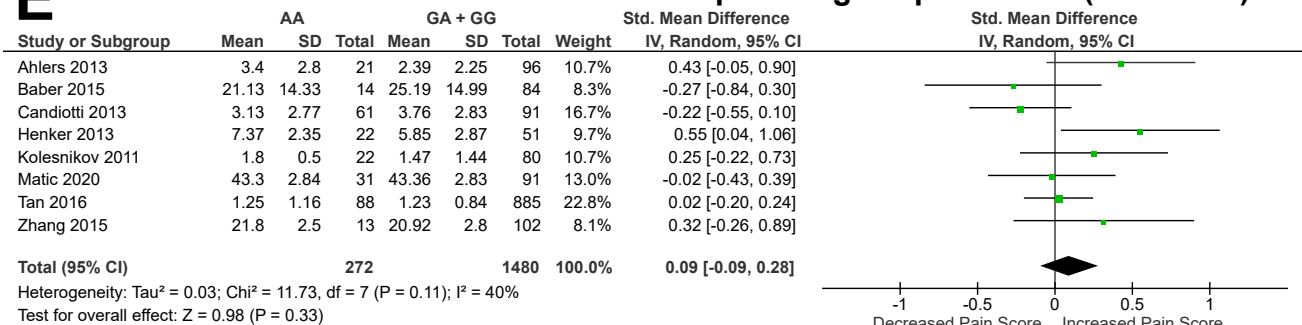

Supplemental Figure 3: Forest plots of associations of COMT rs4680 allele with postsurgical pain
