# Supplementary material
Source: PubMed Central journal article supplement (PMC10859728)
Supplement: NIHMS1963052-supplement-Supp_Fig_4.pdf [file NIHMS1963052-supplement-Supp_Fig_4.pdf]

## A COMT rs4633 association with acute postsurgical opioid use (dominant)

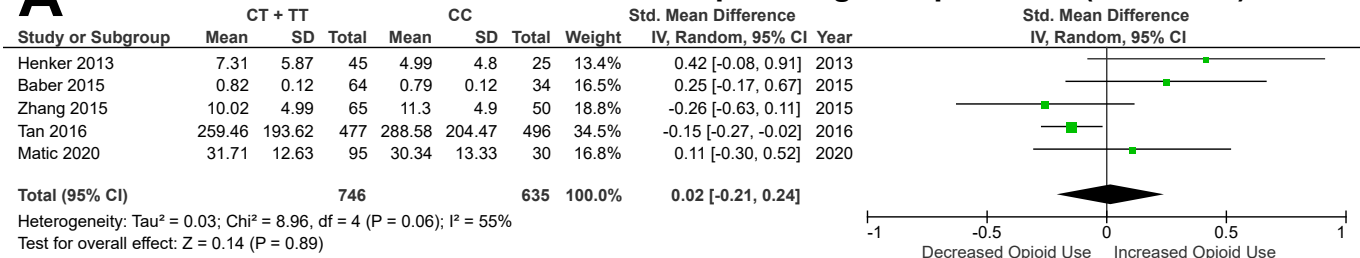

## B COMT rs4633 association with acute postsurgical opioid use (recessive)

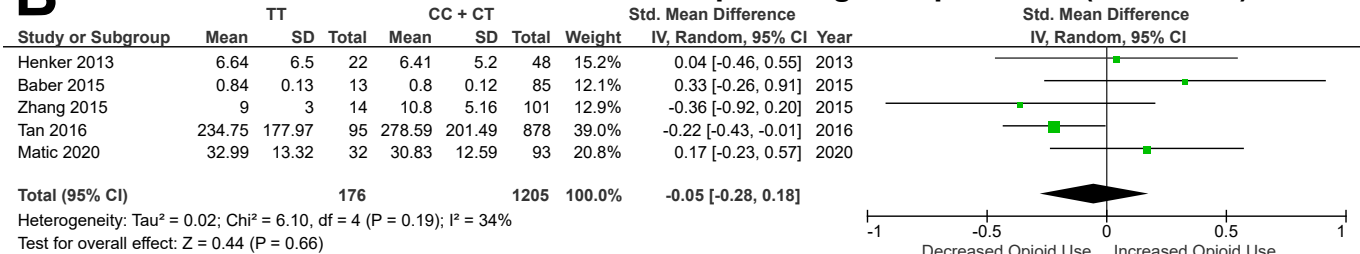

## C COMT rs4633 association with acute postsurgical pain score (dominant)

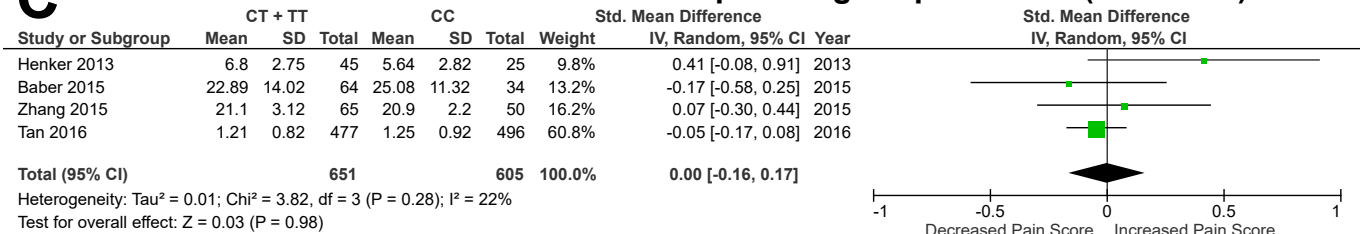

## D COMT rs4633 association with acute postsurgical pain score (recessive)

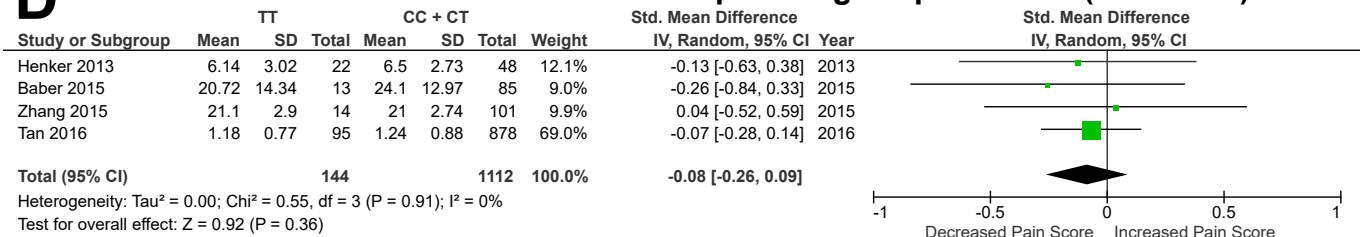

## E COMT rs4633 association with chronic postsurgical pain score

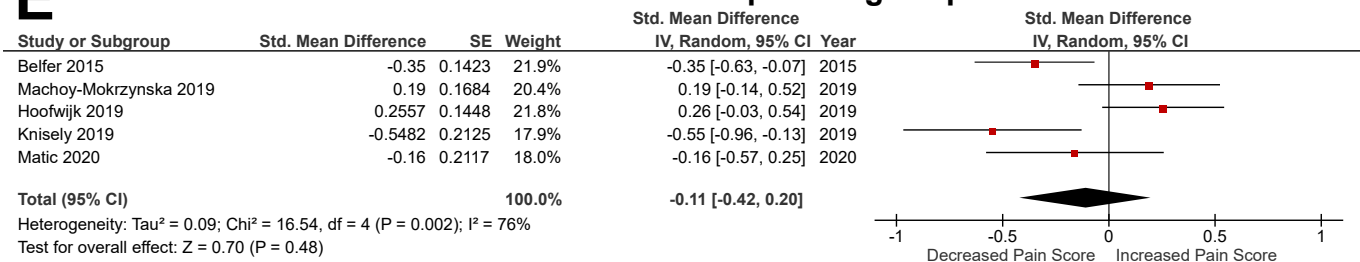

**Supplemental Figure 4: Forest plots of associations of COMT rs4633 allele with postsurgical pain**
