# Supplementary material
Source: PubMed Central journal article supplement (PMC10859728)
Supplement: NIHMS1963052-supplement-Supp_Fig_5.pdf [file NIHMS1963052-supplement-Supp_Fig_5.pdf]

## A COMT rs4818 association with acute postsurgical opioid use (dominant)

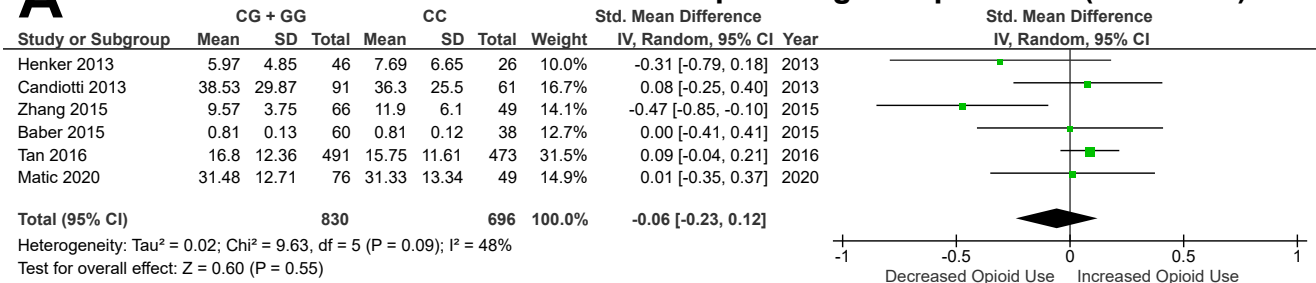

## B COMT rs4818 association with acute postsurgical opioid use (recessive)

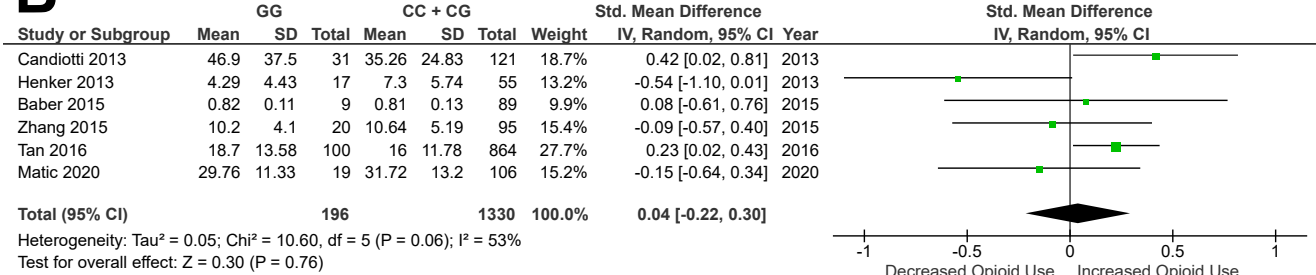

## C COMT rs4818 association with acute postsurgical pain score (dominant)

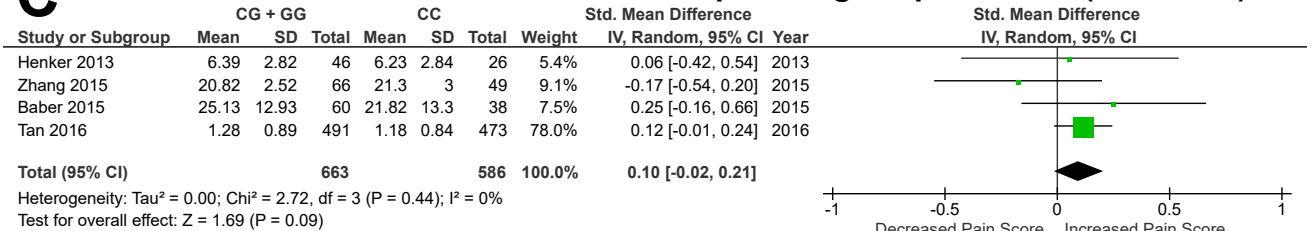

## D COMT rs4818 association with acute postsurgical pain score (recessive)

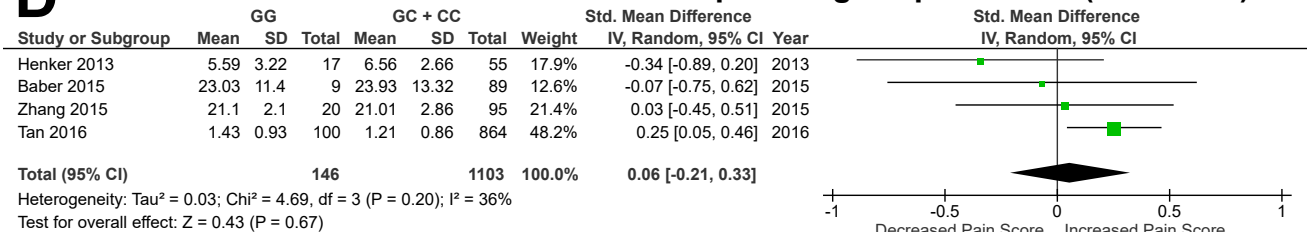

## E COMT rs4818 association with chronic postsurgical pain score

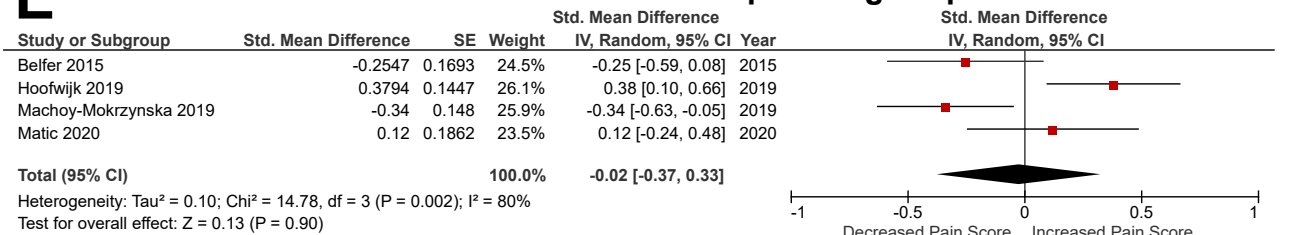

## F COMT rs6269 association with chronic postsurgical pain score

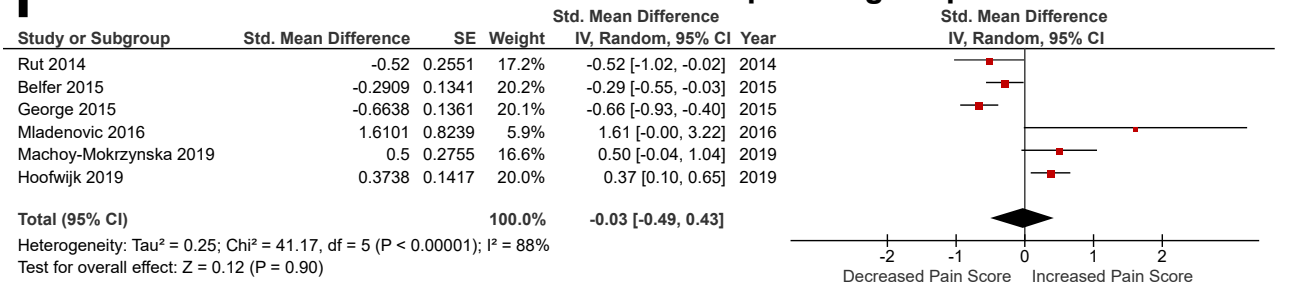

**Supplemental Figure 5: Forest plots of associations of COMT rs4818 and rs6269 alleles with postsurgical pain**
