# Supplementary material
Source: PubMed Central journal article supplement (PMC10859728)
Supplement: NIHMS1963052-supplement-Supp_Fig_6.pdf [file NIHMS1963052-supplement-Supp_Fig_6.pdf]

### A *ABCB1* rs1045642 association with acute postsurgical opioid use (dominant)

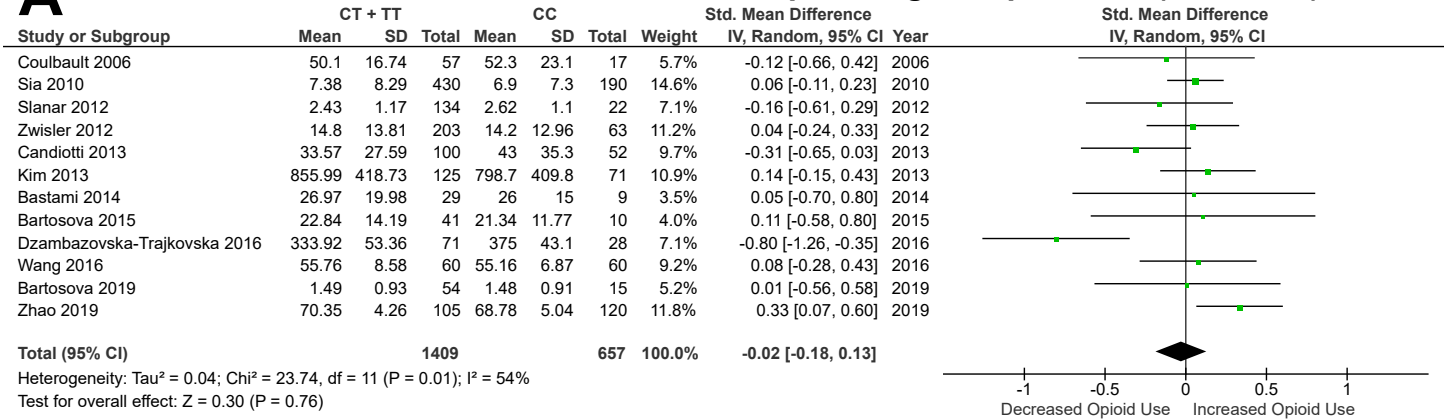

### B *ABCB1* rs1045642 association with acute postsurgical opioid use (recessive)

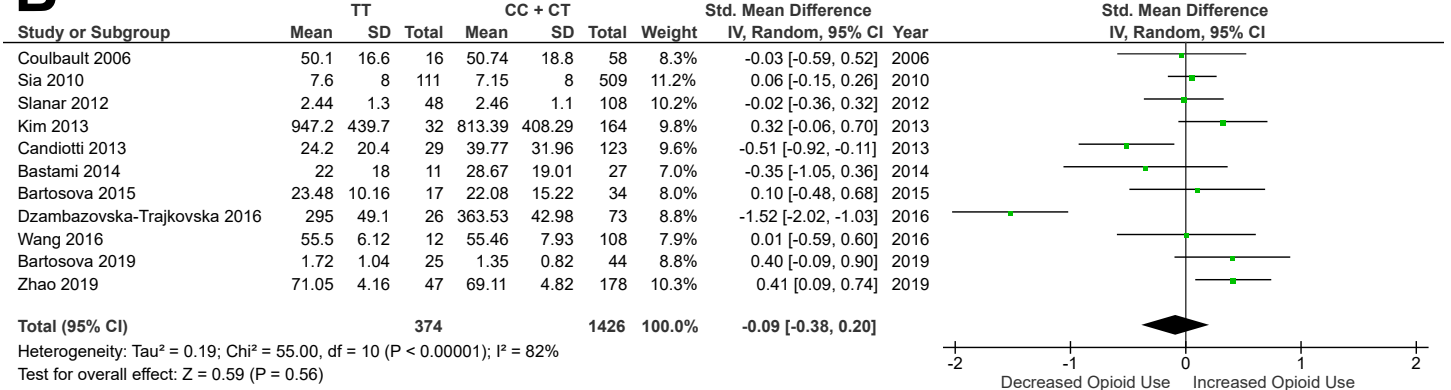

### C *ABCB1* rs1045642 association with acute postsurgical pain score (dominant)

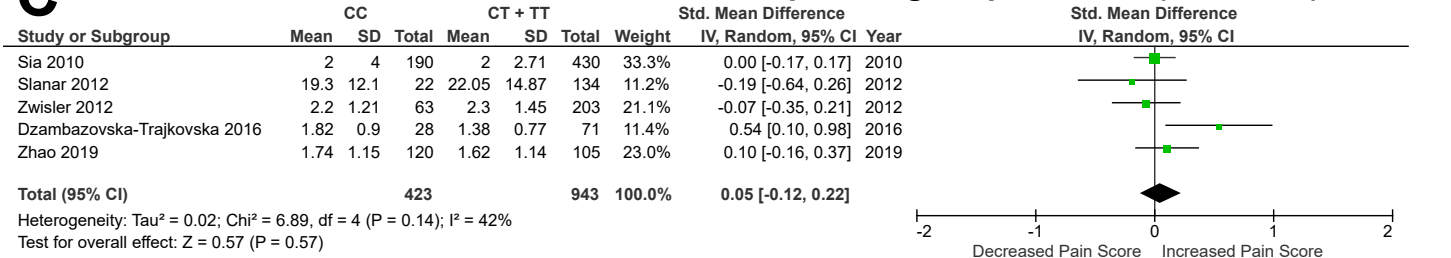

### D *ABCB1* rs1045642 association with acute postsurgical pain score (recessive)

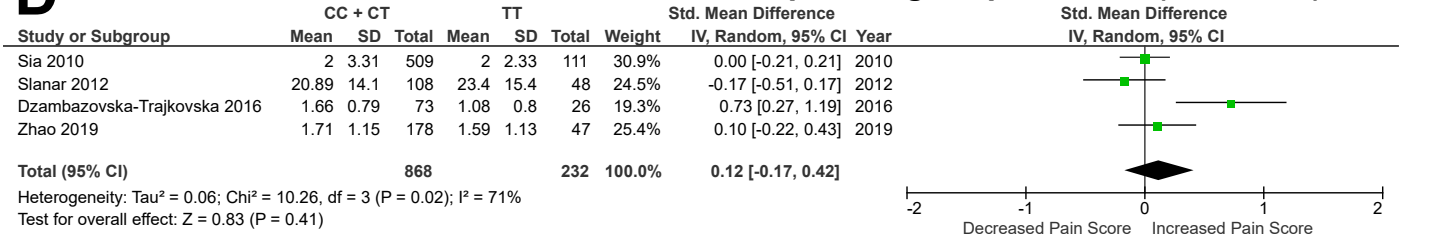

### E *ABCB1* rs2032582 association with acute postsurgical opioid use (dominant)

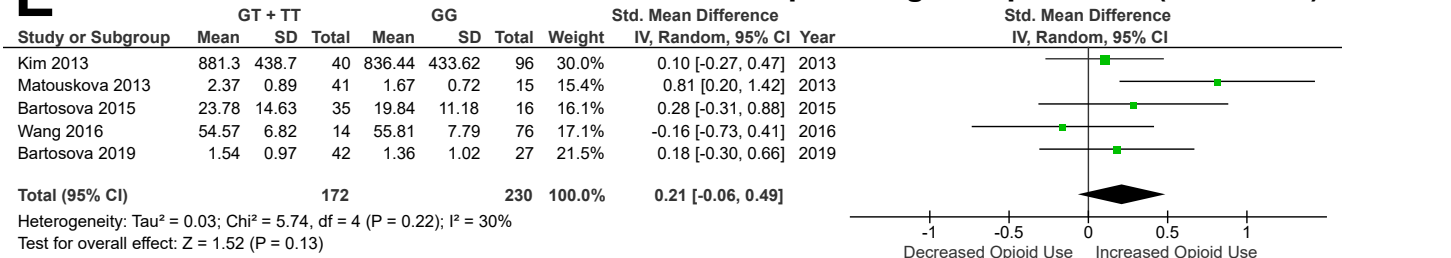

### F *ABCB1* rs2032582 association with acute postsurgical opioid use (recessive)

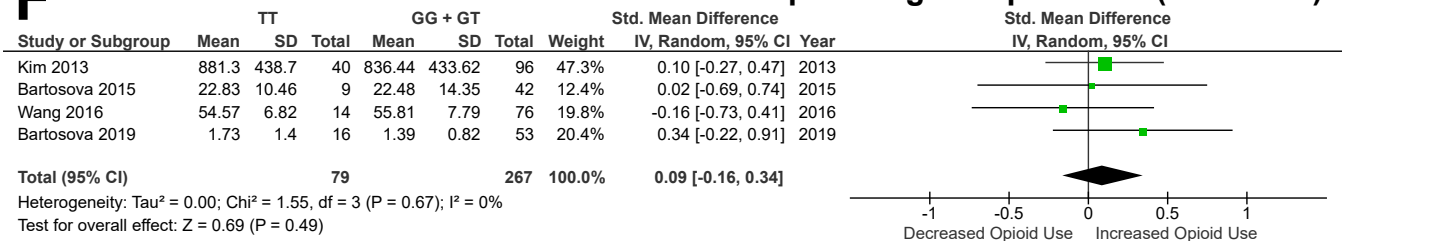

**Supplemental Figure 6: Forest plots of associations of *ABCB1* rs1045642 and rs2032582 alleles with postsurgical pain**
