# Supplementary material
Source: PubMed Central journal article supplement (PMC10859728)

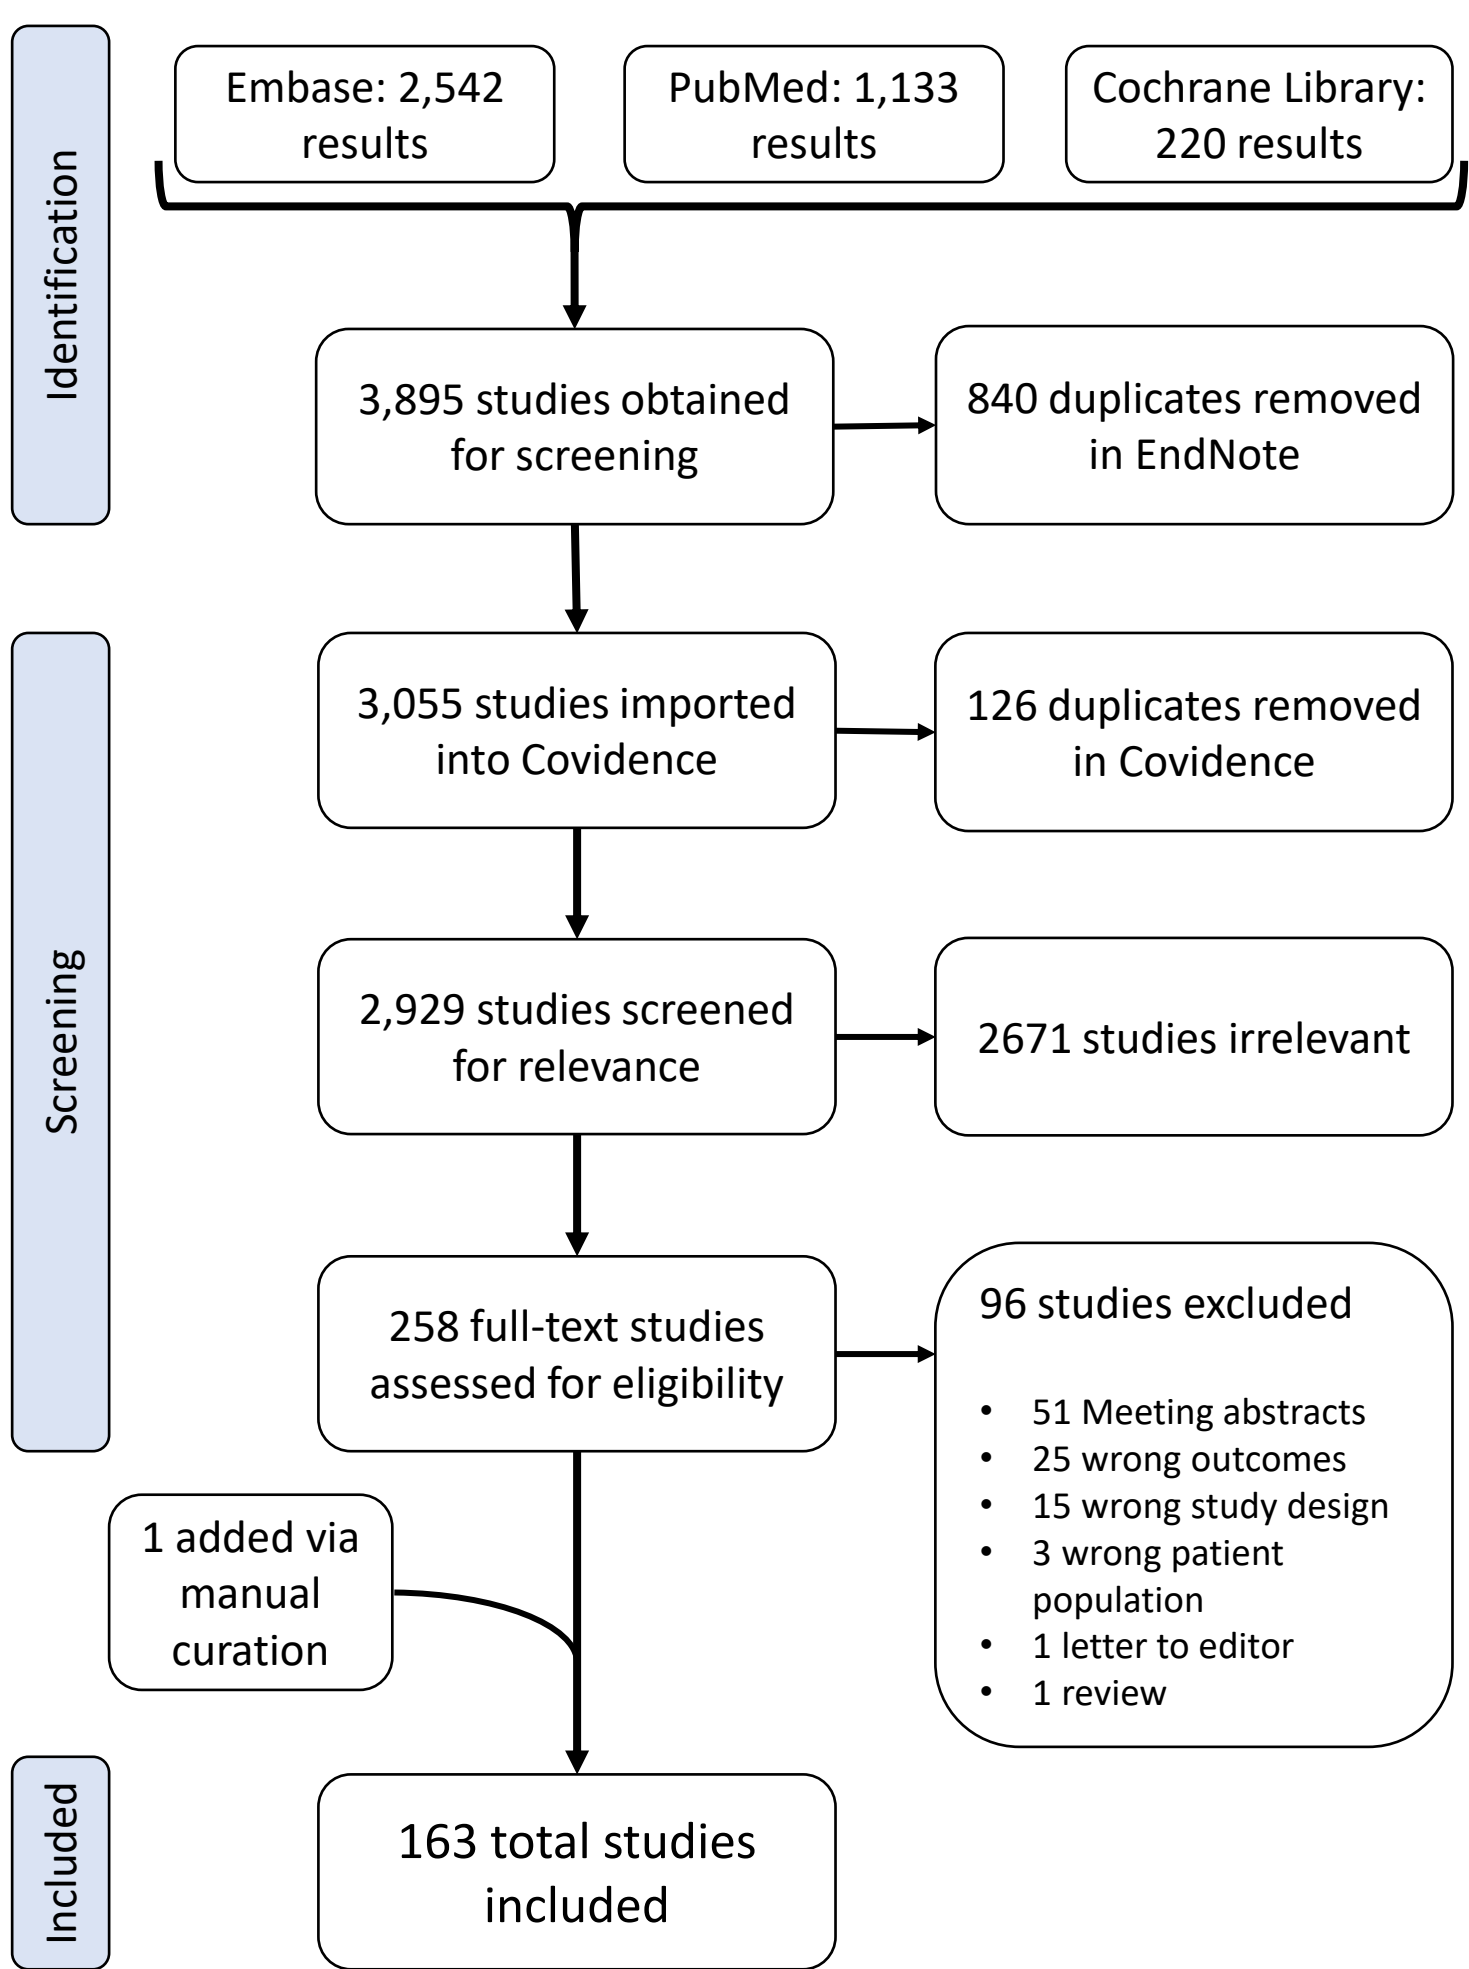

**Supplemental Figure 1: PRISMA flowchart of studies screen and included in systematic review**

Supplement: NIHMS1963052-supplement-Supp_Fig_1.pdf [file NIHMS1963052-supplement-Supp_Fig_1.pdf]
